# Supplementary material for: DNA Double-Strand Break Repair Inhibitors: YU238259, A12B4C3 and DDRI-18 Overcome the Cisplatin Resistance in Human Ovarian Cancer Cells, but Not under Hypoxia Conditions
Source: MDPI journal article supplement (doi:10.3390/cimb45100500), 2023-09-28
Supplement: s1 [file s1]

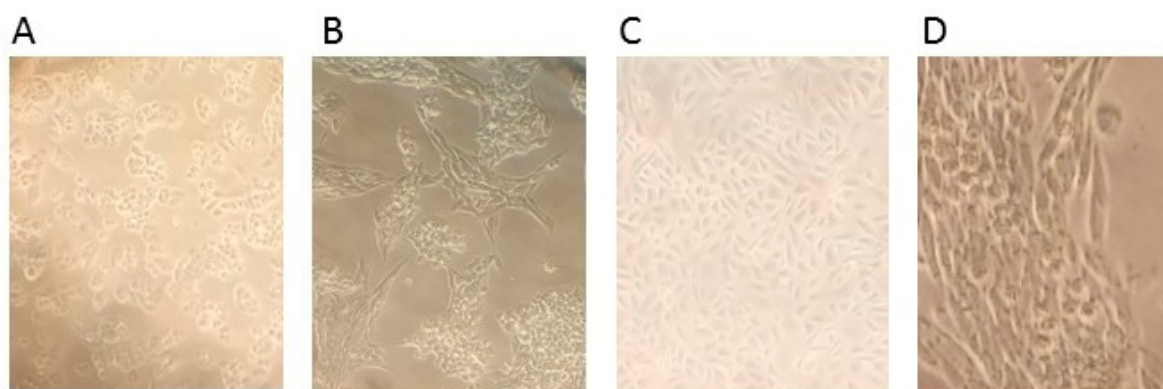

**Figure S1. Microscopic images of ovarian cancer cell lines: A2780 (A), A2780cis (B), PEA1 (C) and PEA2 (D).**

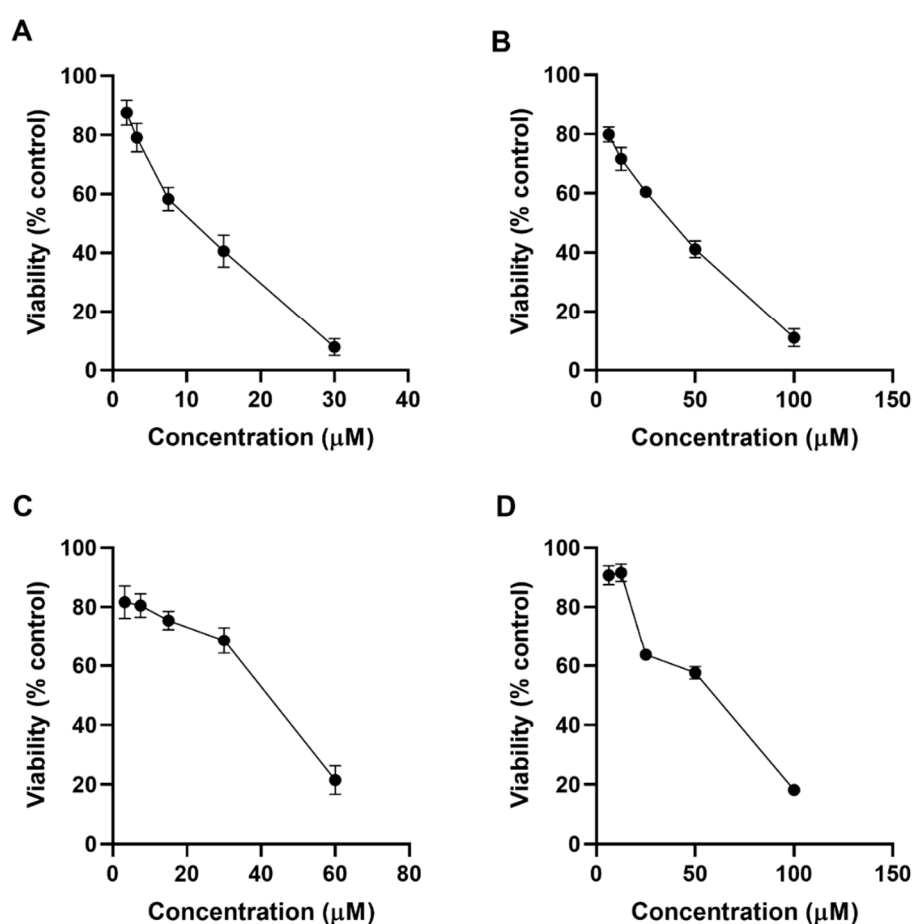

**Figure S2. DNA double-strand break inhibitors (DRIs) increase the cytotoxic effect of CDDP (A, C) and VP-16 (B, D) on A2780 (A, B) and A2780cis (C, D) cell lines.** Treatment with each of compounds caused concentration-dependent growth inhibition on both of cell lines. Cells were stained with Cell Counting Kit-8 and the OD<sub>450nm</sub> was determined. Results are means  $\pm$  SEM of at least 3 experiments.

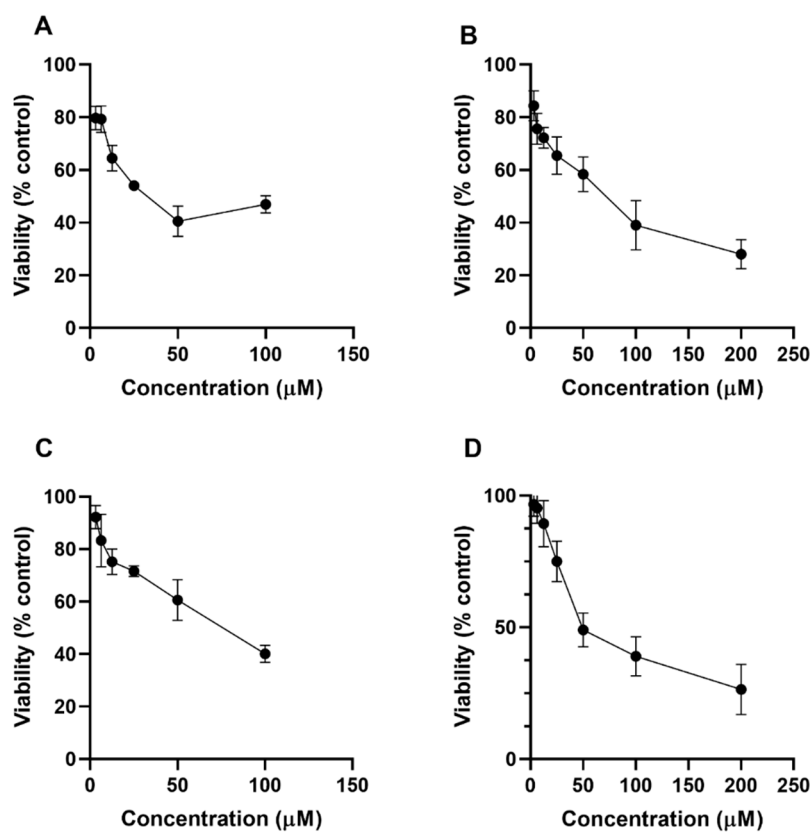

**Figure S3. DNA double-strand break inhibitors (DRIs) increase the cytotoxic effect of CDDP (A, C) and VP-16 (B, D) on PEA1 (A, B) and PEA2 (C, D) cell lines.** Treatment with each of compounds caused concentration-dependent growth inhibition on both of cell lines. Cells were stained with Cell Counting Kit-8 and the OD<sub>450nm</sub> was determined. Results are means  $\pm$  SEM of at least 3 experiments.

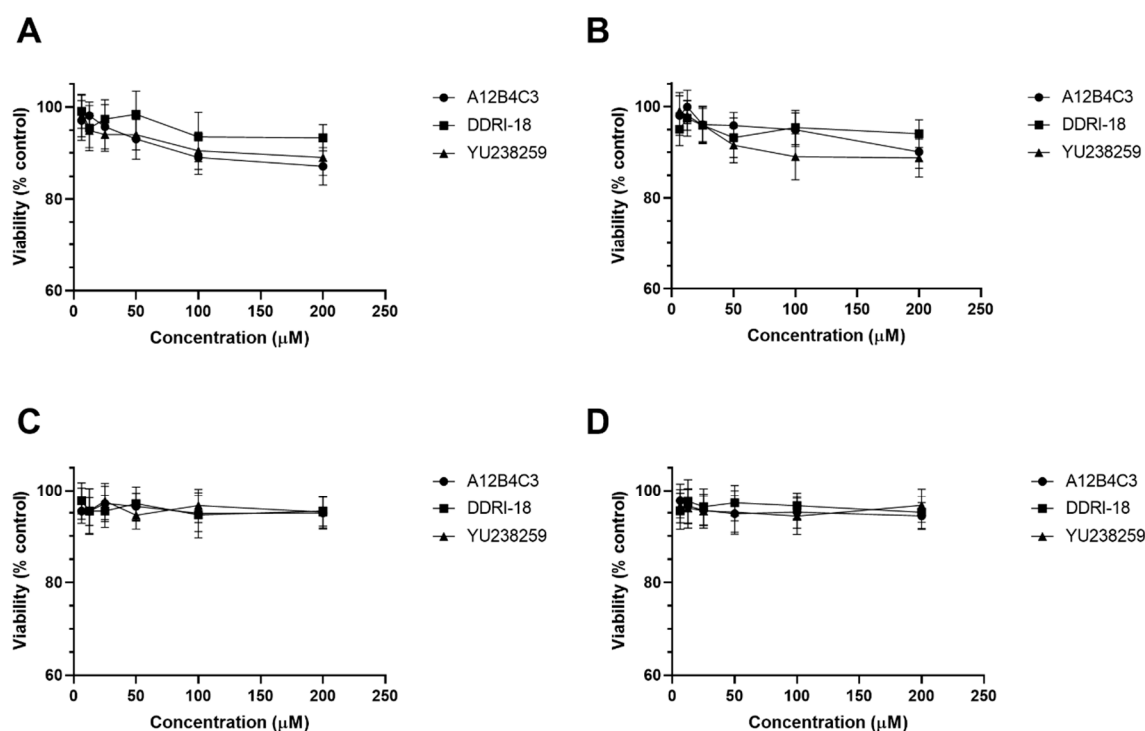

**Figure S4. Double-strand break inhibitors (DRIs) : YU238259, DDRI-18 and A12B4C3 does not decrease the viability of ovarian cancer cells.** Cells were treated with 10 μM YU238259 (filled triangle, solid line), DDRI-18 (filled square, solid line) or 5 μM A12B4C3 (filled circle, solid line). Cells were then stained with Cell Counting Kit-8 and the OD<sub>450nm</sub> was determined. Results are means ± SEM of at least 3 experiments. Results are presented for: A – A2780, B – A2780cis, C – PEA1, D – PEA2.

#### **Experimental scheme 1 (A2780 and A2780cis cell lines)**

The IC<sub>50</sub> values determined for the CDDP/VP-16 combination were compared with the values obtained after the introduction of HR or NHEJ inhibitors. After introducing DRIs to the scheme of treatment, the viability of cells decreased compared to samples treated only with CDDP/VP-16 (Tab. S1). The Rf parameter was determined by comparing the IC<sub>50</sub> values obtained for the variants without the inhibitor and with the inhibitor. In most cases, we obtained Rf > 1. Slightly higher sensitization rates were obtained for the resistant ES1 variant compared with the sensitive variant. Although we did not observe a significant effect of sensitization with YU238259 on A2780 cells (Rf = 0.94), results obtained for CDDP-resistant cells was promising (Rf = 2.52). A12B4C3 caused sensitization in both cell lines: 1.2 and 1.62 fold for A2780 and A2780cis cells, respectively. Treatment with DDRI-18 resulted in Rf = 1.60 for A2780 cells and Rf = 1.99 for its counterpart, A2780cis (Tab. S1). These results indicate the role of inhibitors in sensitizing ES1 line cells to the CDDP/VP-16 combination.

Based on the analysis of survival curves, the CI parameter indicating the type of interactions between the drugs was determined. The synergism of CDDP/VP-16 effects increases with increasing

concentrations of these drugs for the A2780 line. No such relationship was observed for the A2780cis line. The introduction of NHEJ inhibitors caused a decrease in the CI parameter, i.e. a change in the interaction between the drugs towards synergism. HR inhibitor YU238259, also had a similar effect (Tab. S2).

**Table S1. Comparison of IC<sub>50</sub> and Rf values obtained for A2780 and A2780cis cells after incubation with a combination of CDDP/VP-16 and DRIs. Rf >1-sensitization.**

|                        |                         | A2780                 |      | A2780cis              |      |
|------------------------|-------------------------|-----------------------|------|-----------------------|------|
|                        |                         | IC <sub>50</sub> (μM) | Rf   | IC <sub>50</sub> (μM) | Rf   |
| Drugs                  | CDDP/VP-16              | 16.16                 | -    | 35.85                 | -    |
| Drugs + NHEJ inhibitor | CDDP/VP-16/<br>YU238259 | 17.19                 | 0.94 | 14.23                 | 2.52 |
| Drugs + HR inhibitor   | CDDP/VP-16/<br>A12B4C3  | 13.39                 | 1.20 | 22.06                 | 1.62 |
|                        | CDDP/VP-16/<br>DDRI-18  | 10.12                 | 1.60 | 18.05                 | 1.99 |

**Table S2. CI values obtained for A2780 and A2780cis cells after incubation with CDDP/VP-16 and DRIs. CI values <1 and CI >1 indicate synergism and antagonism, respectively. Indications: ↓ - decrease in CI values, ↑ - increase in CI values.**

| Drugs concentration<br>CDDP/VP-16<br>(μM) | CI<br>(for drugs) | CI<br>Drugs +<br>YU238259 | CI<br>Drugs +<br>A12B4C3 | CI<br>Drugs +<br>DDRI-18 |
|-------------------------------------------|-------------------|---------------------------|--------------------------|--------------------------|
| A2780                                     |                   |                           |                          |                          |
| 9.49 (1/4+1/4 IC <sub>50</sub> )          | 5.86              | ↓2.50                     | ↓3.09                    | ↓3.98                    |
| 19 (1/2+1/2 IC <sub>50</sub> )            | 0.83              | ↓0.57                     | ↑0.92                    | ↓0.73                    |
| 38 (1+1 IC <sub>50</sub> )                | 1.15              | ↓0.56                     | ↓0.54                    | ↓0.68                    |
| 76 (2+2 IC <sub>50</sub> )                | 0.61              | ↓0.38                     | ↓0.50                    | ↓0.40                    |
| 152 (4+4 IC <sub>50</sub> )               | 0.52              | ↑0.65                     | ↑1.00                    | ↓0.42                    |
| A2780cis                                  |                   |                           |                          |                          |
| 11.3 (1/4+1/4 IC <sub>50</sub> )          | 0.53              | ↓0.44                     | ↓0.39                    | ↓0.48                    |
| 22.5 (1/2+1/2 IC <sub>50</sub> )          | 0.83              | ↓0.61                     | ↓0.79                    | ↓0.61                    |
| 45 (1+1 IC <sub>50</sub> )                | 0.66              | ↓0.49                     | ↓0.65                    | ↓0.49                    |
| 90 (2+2 IC <sub>50</sub> )                | 0.86              | ↓0.66                     | ↓0.71                    | ↓0.85                    |
| 180 (4+4 IC <sub>50</sub> )               | 1.55              | ↓1.22                     | ↓1.15                    | ↓0.94                    |

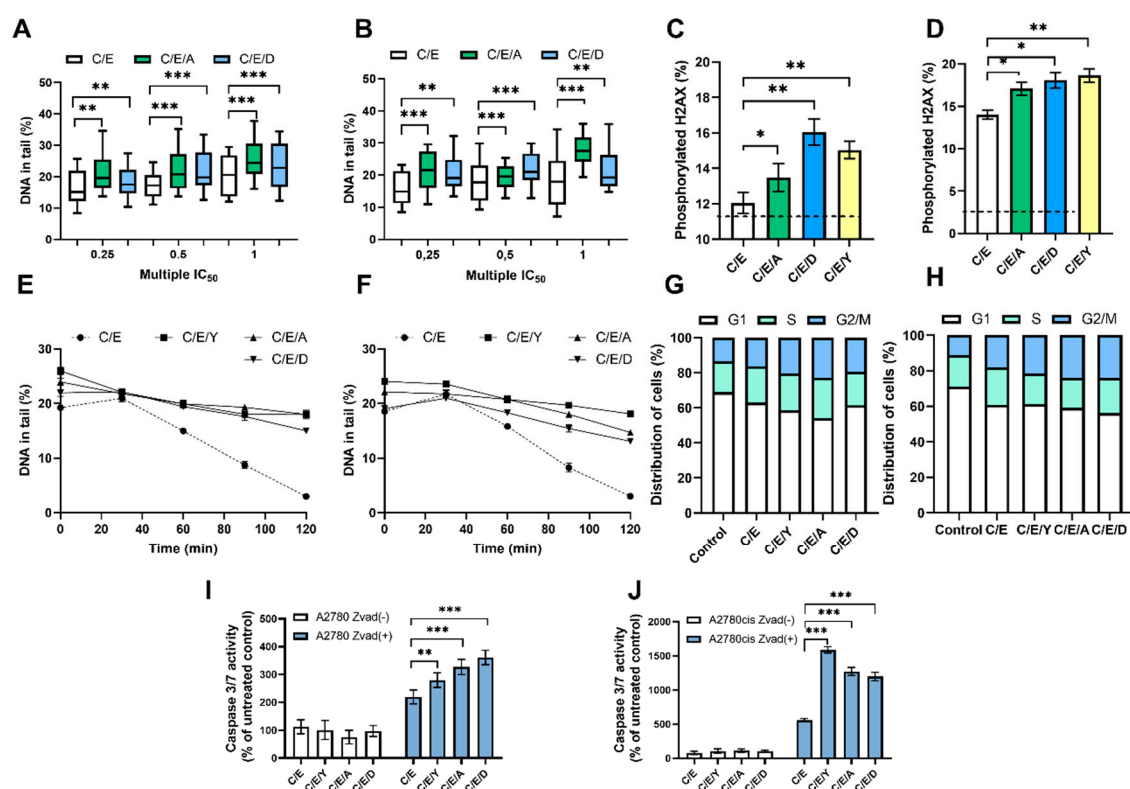

**Figure S5. In normoxia conditions, DRIs are able to improve the activity of CDDP/VP-16 combination against human ovarian cancer cells A2780 (A, C, E, G, I) and A2780cis (B, D, F, H, J).** DRIs significantly increase CDDP/VP-16 induced level of DNA damage (A, B), the level of phosphorylated H2AX (C, D), modulate DNA repair (E, F), affect the distribution of cell cycle (G, H) and caspases 3 and 7 activity (I, J). Results are presented as the mean  $\pm$  SEM (A – B) or mean  $\pm$  SD (C – J) of 3 independent experiments, \* -  $p < 0.05$ ; \*\* -  $p < 0.01$ ; \*\*\* -  $p < 0.001$ .

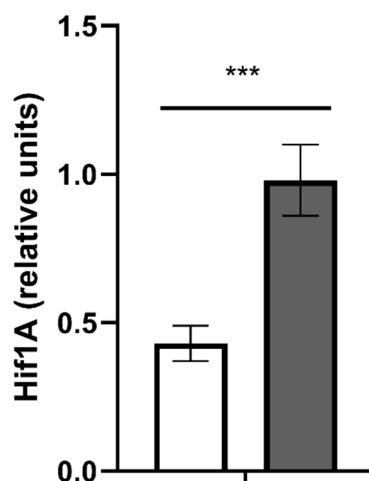

**Figure S6. The level of transcription factor Hif1A is elevated under hypoxia conditions.** ES 2 cells were cultured under aerobic (white bar) and anaerobic (gray bar) conditions for a minimum of 48 hours. Hif1A levels were determined using a commercial Hif1A Human ELISA Kit. Results are presented as the mean  $\pm$ SD of 3 independent experiments, \* -  $p < 0.05$ ; \*\* -  $p < 0.01$ ; \*\*\* -  $p < 0.001$ .

**Table S3. Expression levels of genes involved in DDR in PEA1 cells under hypoxia conditions.** Comparison to control - expression levels under aerobic conditions.

| Decreased gene expression |            |                 | Increased gene expression |            |                 |
|---------------------------|------------|-----------------|---------------------------|------------|-----------------|
| Decrease $\geq 2x$        |            |                 | Increase $\geq 2x$        |            |                 |
| Gene                      | Expression | Pathway         | Gene                      | Expression | Pathway         |
| BRCA1                     | -2.25      | ATM/ATR pathway | GADD45A                   | 3.13       | DNA repair      |
| CDKN1A                    | -2.31      | Apoptosis       | HUS1                      | 2.57       | ATM/ATR pathway |
| CRY1                      | -2.35      | DNA repair      | RAD21                     | 2.26       | DNA repair      |
| MLH1                      | -3.80      | MMR             | Increase 1,5 - 2          |            |                 |
| PPP1R15A                  | -2.70      | Apoptosis       | Gene                      | Expression | Pathway         |
| TP73                      | -2.15      | MMR             | MLH3                      | 1.71       | MMR             |
| XPC                       | -3.73      | NER             | SUMO1                     | 1.55       | DNA repair      |
| XRCC3                     | -11.63     | DNA repair      | UNG                       | 1.68       | BER             |
| Decrease 1,5 - 2x         |            |                 |                           |            |                 |
| Gene                      | Expression | Pathway         |                           |            |                 |
| ABL1                      | -1.59      | MMR             |                           |            |                 |
| BAX                       | -1.70      | Apoptosis       |                           |            |                 |
| CDC25C                    | -1.68      | Cell cycle      |                           |            |                 |
| CHEK1                     | -1.66      | ATM/ATR pathway |                           |            |                 |

|         |       |                 |
|---------|-------|-----------------|
| FANCA   | -1.67 | DNA repair      |
| GADD45G | -1.60 | DNA repair      |
| NBN     | -1.89 | DSBs repair     |
| RAD1    | -1.87 | DNA repair      |
| RBBP8   | -1.60 | DNA repair      |
| TP53    | -1.53 | ATM/ATR pathway |
| XPA     | -1.77 | NER             |

**Table S4. Expression levels of genes involved in DDR in PEA2 cells under hypoxia conditions.**  
Comparison to control - expression levels under aerobic conditions.

| Decreased gene expression |            |                 | Increased gene expression |            |                 |
|---------------------------|------------|-----------------|---------------------------|------------|-----------------|
| Decrease $\geq 5x$        |            |                 | Increase $\geq 5x$        |            |                 |
| Gene                      | Expression | Pathway         | Gene                      | Expression | Pathway         |
| BARD1                     | -8.08      | ATM/ATR pathway | ERCC1                     | 12.96      | NER             |
| BLM                       | -8.15      | DSBs repair     | PPP1R15A                  | 8.11       | Apoptosis       |
| BRCA1                     | -8.55      | ATM/ATR pathway | XRCC3                     | 5.25       | DNA repair      |
| BRIP1                     | -9.50      | DNA repair      | Increase 2 - 5x           |            |                 |
| CDC25A                    | -6.00      | ATM/ATR pathway | BBC3                      | 4.34       | ATM/ATR pathway |
| CDC25C                    | -11.67     | Cell cycle      | DDIT3                     | 4.33       | ATM/ATR pathway |
| CHEK1                     | -7.15      | ATM/ATR pathway | GADD45G                   | 4.78       | DNA repair      |
| CHEK2                     | -6.65      | ATM/ATR pathway | XPC                       | 3.55       | NER             |
| EXO1                      | -22.35     | MMR             |                           |            |                 |
| FANCD2                    | -20.05     | ATM/ATR pathway |                           |            |                 |
| FANCG                     | -5.69      | DSBs repair     |                           |            |                 |
| FEN1                      | -9.91      | BER             |                           |            |                 |
| H2AFX                     | -5.75      | ATM/ATR pathway |                           |            |                 |
| PCNA                      | -7.63      | NER             |                           |            |                 |
| RAD51                     | -7.79      | DSBs repair     |                           |            |                 |
| XRCC2                     | -11.47     | DSBs repair     |                           |            |                 |
| Decrease 2 - 5x           |            |                 |                           |            |                 |
| Gene                      | Expression | Pathway         |                           |            |                 |
| ABL1                      | -2.33      | MMR             |                           |            |                 |
| APEX1                     | -3.48      | BER             |                           |            |                 |
| ATM                       | -2.20      | ATM/ATR pathway |                           |            |                 |
| ATR                       | -2.04      | ATM/ATR pathway |                           |            |                 |

|        |       |                 |
|--------|-------|-----------------|
| ATRIP  | -2.42 | ATM/ATR pathway |
| ATRX   | -4.86 | DNA repair      |
| DDB1   | -2.97 | NER             |
| DDB2   | -2.11 | NER             |
| FANCA  | -2.81 | DNA repair      |
| LIG1   | -2.06 | BER             |
| MBD4   | -2.11 | BER             |
| MLH3   | -2.14 | MMR             |
| MRE11A | -2.52 | DSBs repair     |
| MSH2   | -3.69 | MMR             |
| NBN    | -2.20 | DSBs repair     |
| NTHL1  | -2.56 | NER             |
| PARP1  | -3.41 | BER             |
| PMS1   | -2.96 | MMR             |
| PPM1D  | -4.60 | ATM/ATR pathway |
| PRKDC  | -3.27 | DSBs repair     |
| RAD17  | -3.30 | ATM/ATR pathway |
| RAD18  | -2.11 | DNA repair      |
| RAD21  | -2.99 | DNA repair      |
| RBBP8  | -2.02 | DNA repair      |
| SIRT1  | -3.54 | NER             |
| SMC1A  | -3.78 | ATM/ATR pathway |
| SUMO1  | -2.22 | DNA repair      |
| TOPBP1 | -2.45 | ATM/ATR pathway |
| UNG    | -2.95 | BER             |
| XRCC1  | -2.08 | BER             |
| XRCC6  | -3.18 | DSBs repair     |
